# Supplementary material for: Vibrational Circular Dichroism versus Optical Rotation Dispersion and Electronic Circular Dichroism for diastereomers: the stereochemistry of 3-(1′-hydroxyethyl)-1-(3′-phenylpropanoyl)-azetidin-2-one
Source: Royal Society of Chemistry journal article supplement (doi:10.1039/c2cp40617a), 2012-01-01
Supplement: c2cp40617a.pdf [file c2cp40617a.pdf]

## Supporting information

**Table SII** Boltzmann weights (%) for B3LYP/6-31G\* and B3LYP/cc-pVDZ for 3S1'R-I.

| Conformer | W (cc-pVDZ) | W (6-31G*) |
|-----------|-------------|------------|
| 1         | 4.062       | 1.848      |
| 2         | 10.042      | 3.527      |
| 3         | 10.042      | 6.733      |
| 4         | 4.932       | 2.724      |
| 5         | 2.756       | 1.427      |
| 6         | 2.584       | 1.254      |
| 7         | 5.987       | 2.244      |
| 8         | 5.987       | 2.244      |
| 9         | 5.261       | 3.527      |
| 10        | 4.932       | 3.527      |
| 11        | 2.271       | 1.848      |
| 12        | 5.613       | 3.763      |
| 13        | 3.137       | 1.732      |
| 14        | 5.613       | 1.522      |
| 15        | 2.94        | 1.732      |
| 16        | 5.613       | 6.733      |
| 17        | 1.643       | 1.522      |
| 18        | 3.137       | 3.1        |
| 19        | 4.062       | 20.205     |
| 20        | 2.756       | 1.427      |

5

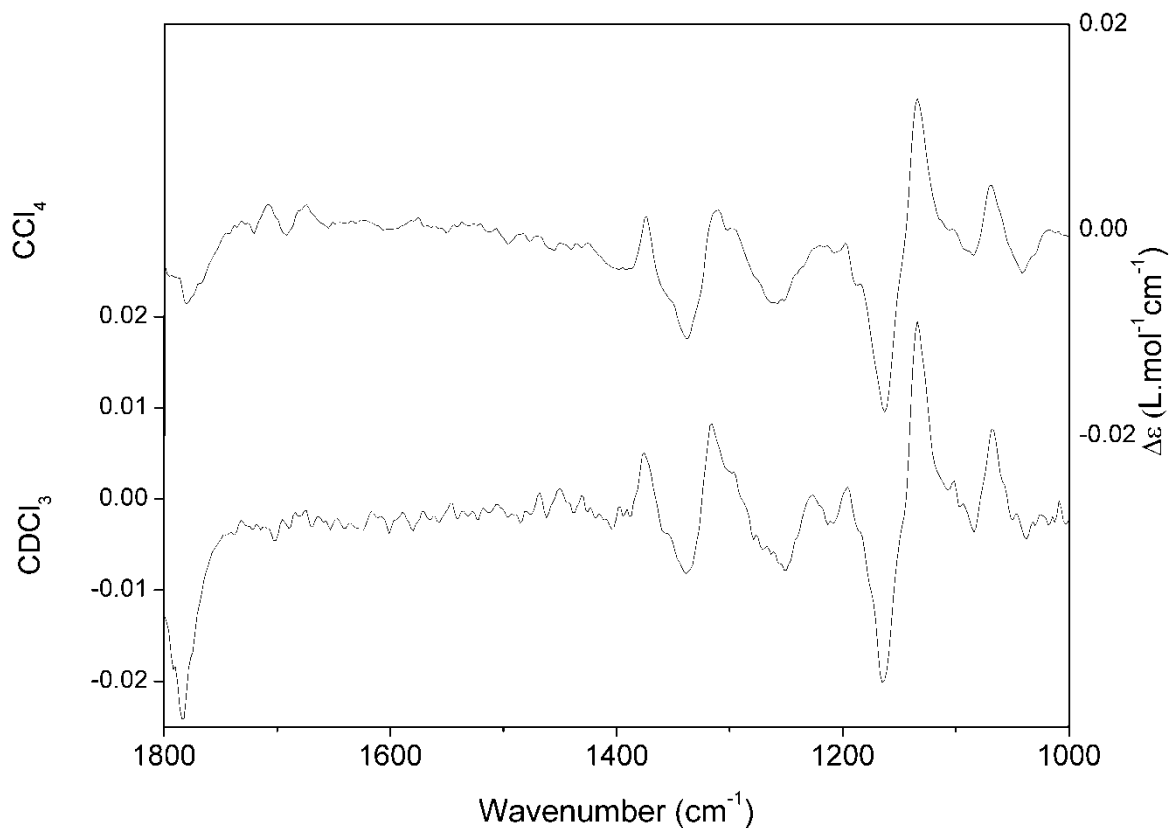

**Fig. S11** Experimental spectra for *I* in CDCl<sub>3</sub> and CCl<sub>4</sub>. Apart from some details and baseline position no differences can be seen, showing that solvent effects are of minor importance for the molecule under study.

5

**Table S12** Similarity measure  $\sum_{ig}$  of the VCD-spectra of 6 conformers of 3*S*1'*S*-*I*, in %, for the region 1000cm<sup>-1</sup> to 1500 cm<sup>-1</sup>. Conformers of the same class have a fairly large similarity index, whereas conformers of different classes show less similarity. This proves that the spectral features in this region are also dependent on the hydroxyethyl dihedral angle, although to a lesser extent than for 3*S*1'*R*-*I*.

---

|              | <b>1 (b)</b> | <b>2 (b)</b> | <b>3 (b)</b> | <b>4 (a)</b> | <b>7 (a)</b> | <b>8 (a)</b> |
|--------------|--------------|--------------|--------------|--------------|--------------|--------------|
| <b>1 (b)</b> | 100          | 72           | 76           | 40           | 47           | 47           |
| <b>2 (b)</b> | 72           | 100          | 54           | 21           | 43           | 23           |
| <b>3 (b)</b> | 76           | 54           | 100          | 33           | 32           | 56           |
| <b>4 (a)</b> | 40           | 21           | 33           | 100          | 77           | 73           |
| <b>7 (a)</b> | 47           | 43           | 32           | 77           | 100          | 74           |
| <b>8 (a)</b> | 47           | 23           | 56           | 73           | 74           | 100          |

---

10

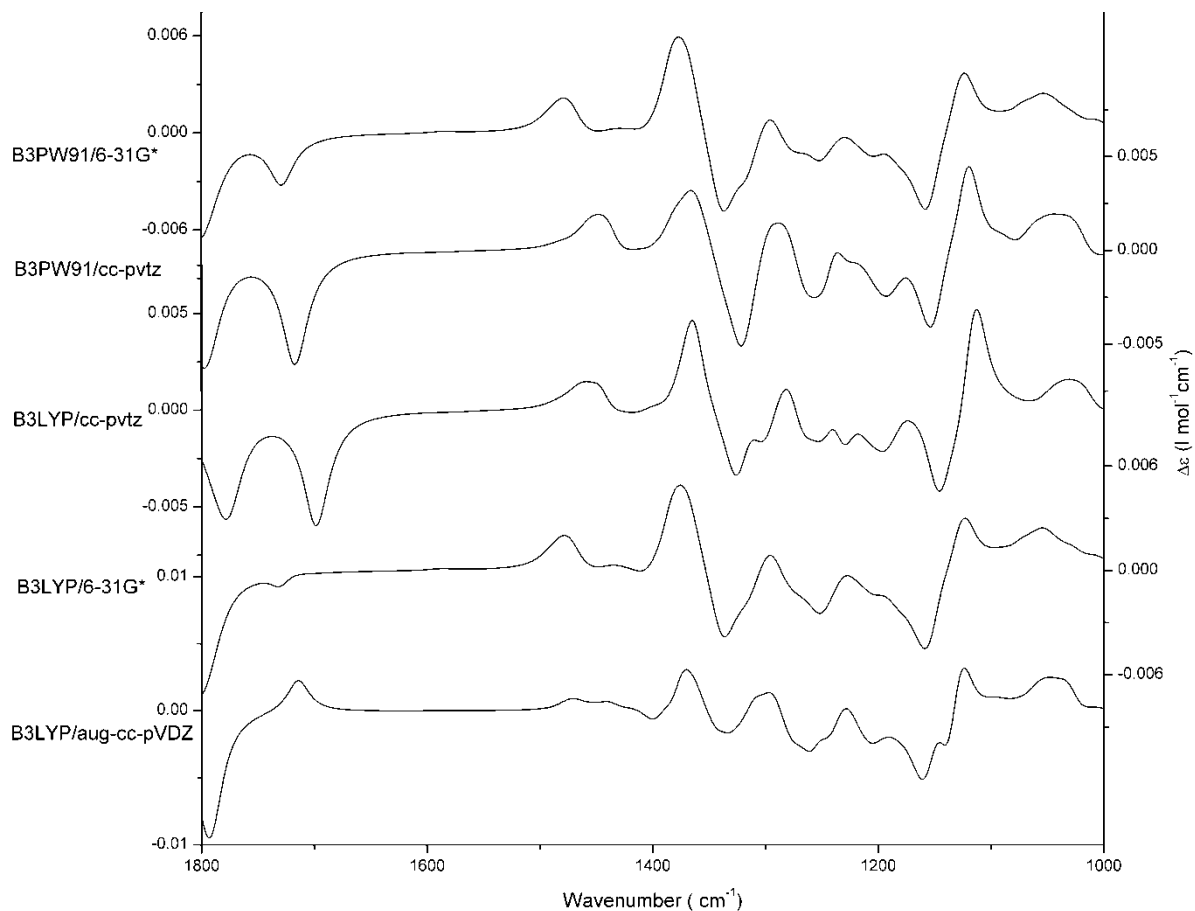

**Fig. S12** Boltzmann weighted, Lorentzian broadened VCD spectra for 3S1'R-1 on 5 different levels of theory. Visual inspection as well as numerical data (Table S13) suggest that little to no sign changes occur when going from one level of theory to another.

5

**Table S13** Similarity of the calculated VCD-spectra on different levels of theory compared to the B3LYP/aug-cc-pVDZ/PCM level of theory used in the article. The data show a very high similarity between levels of theory.

| Functional | Basis set   | $\Sigma_{\max}$ |
|------------|-------------|-----------------|
| B3LYP      | 6-31G*      | 85.1            |
|            | cc-pVTZ     | 73.2            |
|            | aug-cc-pVDZ | 90.6            |
| B3PW91     | 6-31G*      | 79.8            |
|            | cc-pVTZ     | 76.4            |

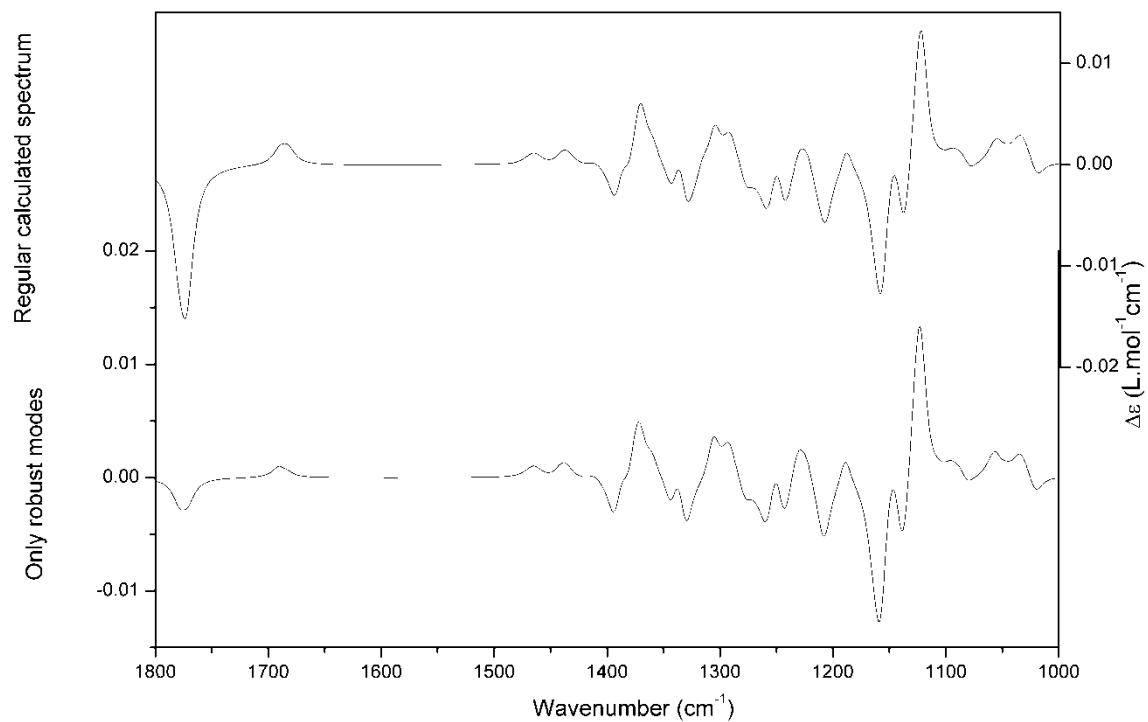

**Fig. S13** VCD spectra for 3S1'R-I generated as usual (upper) and with non-robust modes left out (lower).

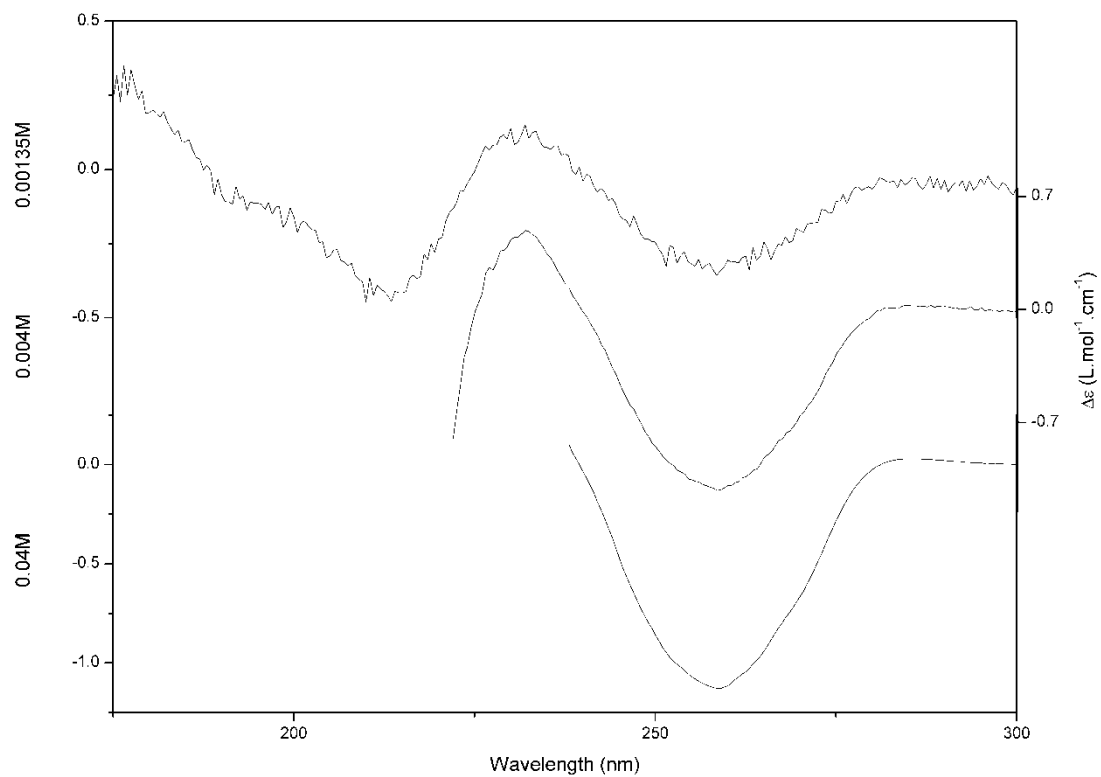

**Fig. SI4** ECD-spectra measured for low (top), medium (middle) and high (bottom) concentration. Increasing the concentration vastly improves S/N but yields spectra in a limited spectral range.
